# Supplementary material for: Malic Enzyme 1 Absence in Synovial Sarcoma Shifts Antioxidant System Dependence and Increases Sensitivity to Ferroptosis Induction with ACXT-3102
Source: Oxford University Press journal article supplement (doi:10.1158/1078-0432.ccr-22-0470), 2022-04-14
Supplement: ccr-22-0470_supplementary_table_1_suppts1.xlsx [file ccr-22-0470_supplementary_table_1_suppts1.xlsx]

## Sheet: Sheet1
Supplemental Table 1 Cell line genotypes
Cell line	cancer subtype	SS18-SSX status	TP53 status
MG-63	osteosarcoma	no trasnlocation	WT
SK-LMS-1	leiomyosarcoma	no trasnlocation	MUT
HTB93	synovial sarcoma	no trasnlocation	WT
SYO-1	synovial sarcoma	SS18-SSX2	WT
FUJI	synovial sarcoma	SS18-SSX2	WT
MOJO	synovial sarcoma	SS18-SSX1	WT
Yamata-SS	synovial sarcoma	SS18-SSX1	MUT
Aska-SS	synovial sarcoma	SS18-SSX1	unknown
HS-SY-II	synovial sarcoma	SS18-SSX1	WT (MDM2 amplified)
