# Supplementary material for: Malic Enzyme 1 Absence in Synovial Sarcoma Shifts Antioxidant System Dependence and Increases Sensitivity to Ferroptosis Induction with ACXT-3102
Source: Oxford University Press journal article supplement (doi:10.1158/1078-0432.ccr-22-0470), 2022-04-14
Supplement: ccr-22-0470_supplementary_table_2_suppts2.xlsx [file ccr-22-0470_supplementary_table_2_suppts2.xlsx]

## Sheet: Sheet1
Supplemental Table 2: Metabolomics
Metabolite Name	HMDB ID
		SYO-WT						SYO-OE						FUJI-WT						FUJI-OE
		1	2	3	4	5	6	7	8	9	10	11	12	13	14	15	16	17	18	19	20	21	22	23	24
2-Oxoglutaric acid	HMDB0000208	N.D.	N.D.	N.D.	N.D.	N.D.	N.D.	41.2755	59.6999	59.0308	52.143	N.D.	35.0438	N.D.	N.D.	N.D.	N.D.	N.D.	N.D.	N.D.	N.D.	38.1401	40.7975	35.7052	N.D.
2-Phosphoglyceric acid	HMDB0003391	N.D.	N.D.	N.D.	N.D.	N.D.	N.D.	8.56319	8.70289	7.28282	7.50691	N.D.	N.D.	N.D.	15.7853	14.7668	17.1251	N.D.	16.289	12.1809	13.3966	N.D.	13.3017	N.D.	12.4812
3-Hydroxybutyric acid	HMDB0000011,HMDB0000357,HMDB0000442	N.D.	N.D.	N.D.	21.5949	N.D.	25.2298	15.3621	15.1053	N.D.	N.D.	17.2	14.3075	N.D.	48.3727	51.012	35.2874	96.5266	96.665	44.292	50.6325	61.9698	27.9336	22.224	39.8774
3-Phosphoglyceric acid	HMDB0000807	41.7522	37.17	N.D.	N.D.	N.D.	N.D.	N.D.	N.D.	N.D.	N.D.	43.1211	N.D.	60.1783	62.1886	56.6192	N.D.	60.188	56.8485	N.D.	N.D.	39.6267	N.D.	N.D.	N.D.
6-Phosphogluconic acid	HMDB0001316	23.9278	24.6965	15.5872	7.71816	N.D.	N.D.	20.0057	11.226	8.77872	N.D.	6.85806	6.97719	31.4025	44.6015	42.4777	16.2506	5.86981	18.3075	67.5846	69.7912	48.6757	24.4336	23.3682	22.5178
Acetyl CoA_divalent		2.46617	4.35701	2.1791	2.35777	2.30184	1.57985	2.97491	4.40151	4.07942	3.34318	3.40796	3.25594	2.90254	2.46246	4.12926	3.78641	3.72426	2.46513	N.D.	N.D.	3.46899	1.66156	1.37495	1.67581
ADP	HMDB0001341	72.9622	88.5998	90.8078	73.538	74.6223	68.2852	75.5711	76.6576	77.3364	57.3209	68.5796	67.7516	432.227	759.258	396.142	522.33	531.045	694.267	994.535	1054.89	742.803	795.65	912.737	929.073
Ala	HMDB0000161,HMDB0001310	321.006	336.709	325.786	306.134	306.75	294.844	441.045	433.6	443.348	472.522	471.216	478.603	879.31	887.647	863.455	912.692	750.614	885.813	1075.65	1051.28	1042.13	1134.05	1165.75	1099.25
AMP	HMDB0000045	8.3517	9.06558	9.71578	9.44974	10.974	8.59601	9.55867	9.97028	10.4758	9.60937	8.13115	10.893	62.1191	79.7444	54.2933	64.634	74.469	92.8338	43.8746	44.6477	34.7643	37.9636	40.2798	42.2745
Arg	HMDB0000517,HMDB0003416	74.3651	86.9934	66.5905	87.6679	78.4529	83.1932	119.813	110.404	113.225	120.786	114.265	118.427	72.7369	113.518	77.3953	115.154	100.828	60.4111	115.675	117.672	88.4588	115.687	125.263	101.823
Asn	HMDB0000168,HMDB0033780	34.142	37.0559	45.5337	36.5532	36.4997	37.8302	43.6953	45.4419	52.0274	36.4772	38.5903	47.0626	98.9295	103.703	97.6058	93.6825	78.1756	92.7476	105.094	112.645	117.503	118.061	120.844	109.279
Asp	HMDB0000191,HMDB0006483	2353.45	2570.04	2283.02	2152.34	2352.99	2119.96	2157.33	2029.01	1848.85	1928.89	1788.85	2007.17	898.063	932.405	915.019	852.845	741.274	887.091	6248.03	6392.42	5954.13	6126.23	6104.1	5841.76
ATP	HMDB0000538	1428.1	1657.8	1434.4	1325.52	1451.89	1116.83	2339.14	2340.89	2306.87	2240.21	2176.91	2107.94	2444.51	2033.4	2360.06	2230.51	2058.75	1916.18	2953.61	2984.26	2985.04	3066.93	2863.66	2795.92
cis-Aconitic acid	HMDB0000072	N.D.	N.D.	N.D.	N.D.	N.D.	N.D.	N.D.	N.D.	N.D.	N.D.	N.D.	N.D.	N.D.	N.D.	N.D.	N.D.	N.D.	N.D.	N.D.	N.D.	N.D.	N.D.	N.D.	N.D.
Citric acid	HMDB0000094	65.274	67.1044	83.4802	N.D.	66.3729	69.4173	200.524	173.768	193.494	172.998	212.396	213.04	185.624	202.293	204.958	194.221	184.744	210.633	130.324	138.147	146.141	132.989	141.235	148.035
Citrulline	HMDB0000904	4.82854	5.28492	12.1251	18.2703	4.83108	5.90722	10.0224	8.67538	7.65013	11.7533	8.50723	7.74374	375.955	344.302	357.45	333.769	269.906	373.996	32.0451	30.54	31.6398	33.942	37.8885	30.7929
CoA_divalent		N.D.	2.39715	1.92997	1.89472	2.2255	1.0229	6.60376	6.30826	7.05303	5.7339	5.44939	4.87449	6.61304	5.90907	5.50398	5.57163	N.D.	2.97374	18.4372	16.1476	13.9787	16.9318	16.5363	16.5609
Cys	HMDB0000574,HMDB0003417	20.4044	24.2256	15.2094	22.5858	42.1707	12.4244	58.8657	55.9325	56.4884	77.5374	55.6333	41.3415	N.D.	N.D.	N.D.	N.D.	N.D.	N.D.	5.01842	7.21054	5.4474	6.37334	5.41095	7.19327
Dihydroxyacetone phosphate	HMDB0001473	42.7417	44.0958	20.3867	54.3918	31.0107	19.3921	54.7794	45.7172	39.3819	43.8799	80.6041	71.6424	87.0133	110.411	155.641	111.136	136.044	99.4156	211.638	214.066	389.94	113.614	193.893	213.262
Erythrose 4-phosphate	HMDB0001321	N.D.	N.D.	N.D.	N.D.	N.D.	N.D.	N.D.	N.D.	N.D.	N.D.	N.D.	N.D.	N.D.	N.D.	N.D.	N.D.	N.D.	N.D.	N.D.	N.D.	N.D.	29.3158	18.7871	23.7505
Fructose 1,6-diphosphate	HMDB0001058	30.1811	25.8482	10.8436	35.0983	19.7935	11.9896	125.246	126.302	121.22	117.503	156.671	123.588	294.702	312.685	362.121	360.153	288.199	310.908	174.848	169.177	98.7003	179.719	165.672	203.837
Fructose 6-phosphate	HMDB0000124	N.D.	N.D.	N.D.	2.983	N.D.	N.D.	3.83865	5.83873	10.0421	11.3369	6.70772	4.68949	9.63924	9.15997	8.69616	8.65169	8.20346	8.57089	13.3412	14.0888	9.84523	13.0517	10.826	11.55
Fumaric acid	HMDB0000134	47.6567	58.1294	50.7889	N.D.	39.0986	N.D.	68.9881	62.7795	64.9416	55.5031	57.9328	53.5764	49.689	48.8849	55.8321	N.D.	37.3155	N.D.	N.D.	N.D.	N.D.	N.D.	N.D.	17.7554
Gln	HMDB0000641,HMDB0003423	3014.95	3228.97	3120.14	2597.18	2819.42	2654.54	3576.97	3370.5	3463.32	3047.84	3293.76	3391.8	9315.22	9060.01	8827.91	8872.27	7521.43	7923.87	7215.4	7335.02	6921.78	6452.87	6538.88	6748.62
Glu	HMDB0000148,HMDB0003339	7622.4	7920.29	7418.78	6849.73	7388.21	6238.93	8192.93	8282.01	8801.91	8702.68	8518.94	8366.67	25395.1	23904.2	24190.6	25690.8	21347	23904.8	14788.4	14884.6	13636.5	14494.4	14102.7	13841.4
Glucose 1-phosphate	HMDB0001586	11.0465	5.50381	11.7566	13.5492	12.587	10.4511	15.885	17.2864	16.2086	18.4892	20.3824	17.8413	47.6232	53.9358	47.8347	64.8271	59.7989	55.5262	41.911	36.6397	32.9358	43.5247	38.1181	39.183
Glucose 6-phosphate	HMDB0001401	6.01137	5.54037	N.D.	4.38291	N.D.	2.6868	6.81662	4.97595	5.18853	5.50556	11.8761	5.8664	17.4935	21.0486	23.6426	30.3974	14.0038	13.5727	51.3078	46.1181	14.631	38.9732	24.7766	25.6432
Glutathione (GSH)	HMDB0000125	1562.03	1725.04	1453.14	1439.07	1848.77	1286.9	2379.34	2439.6	2501.27	2654.18	2341.49	2467.26	1869.18	1454.38	1735.99	1898.24	1032.86	689.658	3287.08	3273.51	3166.9	3890.8	3681.78	3494.03
Glutathione (GSSG)_divalent		252.754	262.269	299.381	222.975	116.996	229.537	202.177	193.387	207.12	154.874	217.183	189.012	484.285	486.582	429.447	408.67	338.219	351.227	475.155	468.948	483.942	457.715	558.299	482.612
Gly	HMDB0000123	2375.59	2490.24	2411.45	2304	2537.56	2072.72	2930.18	2844.25	2996.83	3128.29	3084.72	3046.14	7272.44	6762.24	6885.48	7413.09	6120.03	6752.12	6884.52	6821.64	6440.41	7038.36	6970.38	6939.7
Glyceraldehyde 3-phosphate	HMDB0001112	17.5472	18.3376	N.D.	26.8601	16.5646	N.D.	13.3176	8.89998	11.7443	11.0006	19.1011	18.7587	N.D.	29.9151	N.D.	N.D.	24.9958	N.D.	14.4272	N.D.	N.D.	7.25672	N.D.	N.D.
His	HMDB0000177	224.199	253.939	214.702	222.85	226.479	205.239	303.609	281.084	302.012	307.828	285.649	314.61	377.43	279.514	350.298	355.723	233.151	204.288	389.047	374.781	377.424	469.184	452.355	405.103
Ile	HMDB0000172	627.806	676.764	584.576	599.006	627.604	582.715	785.06	738.428	749.903	789.684	794.167	827.353	1286.65	1223.36	1193.79	1279.1	1012.65	1232.26	1487.09	1504.05	1450.75	1549.84	1558.28	1460.32
Isocitric acid	HMDB0000193	N.D.	N.D.	N.D.	N.D.	N.D.	N.D.	N.D.	N.D.	N.D.	N.D.	N.D.	N.D.	N.D.	N.D.	N.D.	N.D.	N.D.	N.D.	N.D.	N.D.	N.D.	N.D.	N.D.	N.D.
Lactic acid	HMDB0000190,HMDB0001311	829.601	644.829	643.225	976.692	623.814	687.182	837.172	649.114	750.113	975.041	873.15	668.245	1176.98	1602.02	1485.3	1442.35	1592.3	1474.61	1801.46	1745.39	1546.41	1654.31	2063.57	1507.76
Leu	HMDB0000687	639.038	703.246	609.03	609.724	666.409	619.49	782.134	760.523	765.556	798.809	798.123	836.737	1344.61	1301.65	1277.8	1383.89	1100.1	1315.73	1528.39	1541.96	1446.37	1572.78	1588.86	1517.41
Lys	HMDB0000182,HMDB0003405	188.659	216.038	163.705	189.673	191.92	208.832	282.447	258.835	273.702	282.509	274.67	287.324	503.902	489.882	455.818	480.18	413.417	446.744	300.875	336.671	258.705	304.967	312.822	277.364
Malic acid	HMDB0000156,HMDB0000744	286.077	266.228	259.019	247.135	196.199	177.546	382.956	386.921	346.874	364.043	327.447	294.184	305.77	350.558	352.115	294.342	326.174	273.101	309.943	310.306	280.278	224.477	224.068	271.821
Met	HMDB0000696	134.155	135.076	136.93	122.28	150.911	102.829	153.437	177.3	178.962	156.838	153.801	168.393	192.169	314.72	308.345	265.358	218.04	265.107	287.169	286.361	279.991	288.896	343.73	308.107
NAD+	HMDB0000902	181.54	172.498	195.562	186.61	140.255	125.028	243.673	254.898	266.004	288.97	304.435	265.7	325.104	348.652	308.319	352.138	286.183	281.239	358.434	358.282	336.781	289.263	326.256	299.837
NADH	HMDB0001487	7.22512	7.07748	4.10188	6.26076	6.16041	4.14286	7.27298	6.32435	6.1506	6.26673	7.82583	6.88976	11.3922	12.4577	12.9319	12.0363	13.1278	17.0062	8.1731	9.55323	7.48579	7.71395	7.38287	8.24973
NADP+	HMDB0000217	2.6249	3.95893	4.8648	3.14556	3.88177	2.51851	7.33073	11.2801	9.77437	11.1337	10.3716	8.41338	7.5445	7.40291	7.56038	8.79024	8.99201	6.12866	10.9828	12.1836	8.12215	9.16907	8.21112	7.86885
NADPH_divalent	HMDB0000221	N.D.	N.D.	N.D.	N.D.	N.D.	N.D.	N.D.	N.D.	N.D.	N.D.	N.D.	N.D.	N.D.	N.D.	N.D.	N.D.	N.D.	N.D.	N.D.	N.D.	N.D.	N.D.	N.D.	N.D.
Ornithine	HMDB0000214,HMDB0003374	10.697	17.281	32.1892	22.9249	11.7492	15.6166	17.4506	12.2643	14.5754	17.0938	12.4929	10.5635	41.5187	47.3762	41.2985	41.9166	39.8467	35.4278	16.205	19.4576	14.7541	21.5032	37.3182	14.1746
Phe	HMDB0000159	400.666	435.432	401.369	386.885	413.182	370.457	518.358	503.435	497.396	525.296	546.147	543.915	811.066	808.418	770.251	802.369	691.412	771.588	1088.57	1061.72	1015.82	1088.18	1041.76	1056.22
Phosphoenolpyruvic acid	HMDB0000263	N.D.	N.D.	N.D.	N.D.	N.D.	11.8584	N.D.	N.D.	N.D.	N.D.	N.D.	N.D.	16.8686	N.D.	N.D.	N.D.	N.D.	N.D.	N.D.	31.1473	21.8948	N.D.	N.D.	N.D.
Pro	HMDB0000162,HMDB0003411	411.374	436.485	446.486	392.386	425.625	362.107	590.335	592.191	618.184	644.943	624.398	604.643	743.144	732.51	738.012	762.928	665.172	771.649	707.778	666.608	710.027	717.908	712.064	724.2
PRPP	HMDB0000280	N.D.	6.42594	6.52355	4.68348	N.D.	N.D.	33.88	33.5809	29.3659	38.0707	38.7158	28.5311	14.1057	13.6478	11.3653	12.8589	11.9451	14.0941	N.D.	8.78897	7.87903	7.56773	8.29922	N.D.
Pyruvic acid	HMDB0000243	N.D.	N.D.	N.D.	N.D.	N.D.	N.D.	N.D.	N.D.	N.D.	N.D.	N.D.	N.D.	N.D.	N.D.	N.D.	N.D.	N.D.	N.D.	N.D.	N.D.	N.D.	N.D.	N.D.	N.D.
Ribose 5-phosphate	HMDB0001548	54.0818	56.7286	47.8875	61.0619	60.493	48.6816	35.3289	51.9003	37.8115	39.9776	41.3769	40.3089	20.0302	10.3236	21.8911	15.4012	13.8379	9.89748	6.31199	6.13616	6.14624	N.D.	4.20927	4.605
Ribulose 5-phosphate	HMDB0000618	125.565	129.484	123.152	126.134	123.992	105.958	85.5412	107.446	87.8472	80.5396	112.824	104.395	194.832	114.245	231.903	174.996	176.433	104.884	66.619	64.7325	85.1024	76.9657	68.9543	69.6246
Sedoheptulose 7-phosphate	HMDB0001068	28.085	32.629	31.8176	28.0643	37.8076	25.512	22.4501	24.6226	23.9251	22.192	22.4837	21.8235	185.713	189.619	184.749	203.345	177.526	183.659	54.7127	59.1007	47.2757	55.641	55.5303	45.2462
Ser	HMDB0000187,HMDB0003406	665.57	708.224	706.732	663.504	654.155	589.223	886.259	846.103	846.318	836.667	899.511	900.066	2031.95	1999.68	1948.2	2122.51	1817.55	1964.28	1930.76	1923.29	1767.95	1924.16	1926.23	1978.99
Succinic acid	HMDB0000254	64.9904	73.645	66.3862	N.D.	N.D.	51.5849	64.1083	63.9234	47.7602	82.4029	60.1209	41.9093	148.928	148.7	133.697	147.237	131.262	175.949	53.8534	50.1815	N.D.	N.D.	51.4738	36.8653
Thr	HMDB0000167	1083.91	1181.91	1083.02	1048.26	1074.82	1017.05	1382.4	1353.16	1324.24	1376.34	1466.78	1440.7	3240.4	3136.68	3039.76	3281.61	2843.67	3108.36	2910.24	2964.28	2740.39	2918.53	2939.31	2881.38
Trp	HMDB0000929	65.9427	70.8865	63.432	57.7702	64.6224	56.4624	80.831	76.2832	77.9644	83.5416	89.9335	81.9625	82.9273	100.821	84.8865	91.6278	86.3701	88.6641	155.313	158.621	147.081	145.747	151.493	151.255
Tyr	HMDB0000158	327.926	346.005	328.554	317.419	328.796	303.574	458.103	446.109	447.7	478.533	503.681	485.038	713.79	747.505	692.514	699.66	620.056	693.701	1008.05	1010.22	952.209	989.048	974.976	978.045
Val	HMDB0000883	688.062	747.008	672.02	667.597	708.848	670.172	844.101	794.542	831.508	872.067	843.204	875.024	1298.4	1266.89	1232.72	1389.42	1079.62	1282.38	1595.88	1604.18	1519.06	1622.14	1620.68	1561.58
