# Supplementary material for: Malic Enzyme 1 Absence in Synovial Sarcoma Shifts Antioxidant System Dependence and Increases Sensitivity to Ferroptosis Induction with ACXT-3102
Source: Oxford University Press journal article supplement (doi:10.1158/1078-0432.ccr-22-0470), 2022-04-14
Supplement: ccr-22-0470_supplementary_table_3_suppts3.xlsx [file ccr-22-0470_supplementary_table_3_suppts3.xlsx]

## Sheet: Sheet1
Supplemental table 3 C13Glutamine Tracing
		Control-S	ME1-OE-S	Control-S	ME1-OE-S	Control-S	ME1-OE-S	Control-H	ME1-OE-H	Control-H	ME1-OE-H	Control-H	ME1-OE-H	Control-F	ME1-OE-F	Control-F	ME1-OE-F	Control-F	ME1-OE-F
Glutathione (GSH)	0	0.707526	0.679139	0.559867	0.455143	0.529795	0.512075	1.50477	0.490421	0.520693	0.323357	0.642575	0.344966	9.08997	0.0584322	5.26233	0.0176797	4.16902	0.012299
	1
	2	0.024291	0.0250081	0.0260209	0.0254212	0.0282308	0.0327931	0.0434576	0.0177083	0.0197761	0.0148684	0.0283457	0.0184758	0.278644	0.0025932	0.185156	0.00126213	0.181191	0.000925181
	3	0.00419713	0.00536182	0.0235115	0.039698	0.0321962	0.0503656	0.00587534	0.00278102	0.0103979	0.00822931	0.0275419	0.0228611	0.0380167		0.0620425		0.190593
	4	0.00097473	0.00151679	0.00525762	0.0101807	0.00718208	0.0126636	0.000965906		0.00291057	0.00266975	0.00739952	0.00701522	0.00672373		0.0196941		0.0536712
	5	0.00678462	0.0181558	0.0528899	0.119691	0.0636805	0.134963	0.00425474	0.00550202	0.0320612	0.0354935	0.0850257	0.0926532	0.0237421	0.000839769	0.268476	0.00316074	0.748198	0.00467765
	6		0.00137575	0.00418763	0.0088563	0.00488109	0.00977967			0.00278718	0.00332305	0.00659075	0.0074522			0.0234615		0.0563607
	7
	8
	9
	10
		Control-S	ME1-OE-S	Control-S	ME1-OE-S	Control-S	ME1-OE-S	Control-H	ME1-OE-H	Control-H	ME1-OE-H	Control-H	ME1-OE-H	Control-F	ME1-OE-F	Control-F	ME1-OE-F	Control-F	ME1-OE-F
Glutathione (GSSG)	0	0.0357969	0.0460877	0.0370896	0.0369693	0.0278869	0.0358246	0.0706216	0.0431135	0.0800276	0.0547367	0.0639454	0.0415742	0.589249	0.0110825	0.764659	0.00661714	0.48645	0.00472451
	1
	2	0.00398033	0.0052258	0.00433265	0.00574395	0.0043858	0.00644501	0.00752709	0.00512236	0.00963242	0.00597998	0.00852361	0.00583075	0.0655192	0.00139778	0.0794352		0.0631625
	3	0.00102951	0.00127362	0.00597833	0.0102071	0.00640005	0.0110806	0.00196929	0.00143304	0.00586677	0.00449187	0.00945105	0.00872359	0.0157919		0.036795		0.0682347	0.00134108
	4			0.00207886	0.00440847	0.00219515	0.00466615			0.00237382	0.00184369	0.00349163	0.00388605	0.00453821		0.0158175		0.0310257
	5	0.00120858	0.00413619	0.0107186	0.0268764	0.0107772	0.0261389		0.001619	0.0137716	0.0158352	0.0262893	0.0294648	0.00583064		0.123147	0.00342469	0.236571	0.00519312
	6			0.00269097	0.00686027	0.00293897	0.00792466			0.00332338	0.00380583	0.00707668	0.0072708			0.0248578		0.0560267	0.00127998
	7			0.00199992	0.00506947	0.00169582	0.00511304			0.00242262	0.00286018	0.00427872	0.00487839			0.0222857		0.040369
	8				0.0045613	0.0012132	0.00453353			0.000900769	0.00103026	0.0028484	0.00378243			0.00613638		0.0223736
	9				0.00130707							0.000897003	0.00143392					0.00745787
	10			0.00101592	0.00482272	0.000867047	0.00520455			0.000997211	0.00169222	0.0026742	0.00542829					0.0323174	0.00135028
	11
	12
	13
	14
	15
	16
	17
	18
	19
	20
